# Supplementary material for: Alteration in Levels of Specific miRNAs and Their Potential Protein Targets between Human Pancreatic Cancer Samples, Adjacent Normal Tissue, and Xenografts Derived from These Tumors
Source: MDPI journal article supplement (doi:10.3390/life13030608), 2023-02-22
Supplement: s1 [file s1]

Supplementary Table S1: List of differentially expressed (DE) miRNA in Tumour vs adjacent normal tissue comparison

| Transcript ID(Array Design) | Tumour Avg (log2) | Normal Avg (log2) | Fold Change | P-val    |
|-----------------------------|-------------------|-------------------|-------------|----------|
| hsa-miR-21-3p               | 6.37              | 2.68              | 12.89       | 1.20E-03 |
| hsa-miR-708-5p              | 6.11              | 2.92              | 9.15        | 6.70E-03 |
| hsa-miR-181c-5p             | 6.69              | 3.6               | 8.52        | 3.00E-03 |
| hsa-miR-125b-1-3p           | 5.43              | 2.64              | 6.95        | 3.18E-02 |
| hsa-miR-21-5p               | 6.94              | 4.15              | 6.89        | 1.58E-02 |
| hsa-miR-331-5p              | 4.39              | 1.62              | 6.81        | 3.60E-03 |
| hsa-miR-210-3p              | 7.9               | 5.15              | 6.73        | 6.60E-03 |
| hsa-miR-181d-5p             | 6.79              | 4.08              | 6.51        | 2.28E-02 |
| hsa-miR-214-5p              | 6.35              | 3.69              | 6.3         | 1.02E-02 |
| hsa-miR-143-5p              | 3.84              | 1.36              | 5.55        | 2.00E-04 |
| hsa-miR-6831-5p             | 5.58              | 3.32              | 4.82        | 2.16E-02 |
| hsa-miR-941                 | 4.58              | 2.42              | 4.47        | 3.20E-02 |
| hsa-miR-125a-3p             | 5.68              | 3.54              | 4.4         | 1.84E-02 |
| hsa-miR-5195-3p             | 4.24              | 2.22              | 4.07        | 1.22E-02 |
| hsa-miR-505-3p              | 4.71              | 2.71              | 4           | 1.88E-02 |
| hsa-miR-874-3p              | 7.71              | 5.73              | 3.96        | 3.30E-02 |
| hsa-miR-664b-5p             | 4.66              | 2.68              | 3.94        | 2.80E-03 |
| hsa-let-7d-3p               | 4.36              | 2.42              | 3.84        | 2.41E-02 |
| hsa-miR-34c-3p              | 3.74              | 1.92              | 3.54        | 1.08E-05 |
| hsa-miR-766-3p              | 4.39              | 2.62              | 3.4         | 3.45E-02 |
| hsa-miR-1231                | 6.16              | 4.51              | 3.14        | 2.08E-02 |
| hsa-miR-4269                | 7.08              | 5.47              | 3.06        | 2.30E-02 |
| hsa-miR-6851-5p             | 4.08              | 2.48              | 3.04        | 3.90E-03 |
| hsa-miR-146b-3p             | 5.18              | 3.61              | 2.96        | 4.01E-02 |
| hsa-mir-941-1               | 4.31              | 2.79              | 2.87        | 1.12E-02 |
| hsa-mir-941-2               | 4.31              | 2.79              | 2.87        | 1.12E-02 |
| hsa-mir-941-3               | 4.31              | 2.79              | 2.87        | 1.12E-02 |
| hsa-mir-941-4               | 4.31              | 2.79              | 2.87        | 1.12E-02 |
| hsa-miR-6890-5p             | 3.99              | 2.49              | 2.83        | 1.10E-03 |
| hsa-miR-4725-3p             | 3.84              | 2.42              | 2.66        | 3.00E-03 |
| hsa-miR-24-2-5p             | 3.38              | 2                 | 2.6         | 4.70E-03 |
| hsa-miR-4726-5p             | 3.39              | 2.05              | 2.52        | 5.30E-03 |
| hsa-miR-6165                | 5.78              | 4.45              | 2.52        | 2.04E-02 |
| hsa-miR-8071                | 3.64              | 2.31              | 2.51        | 1.53E-02 |
| hsa-miR-1292-5p             | 4.28              | 2.98              | 2.47        | 1.46E-02 |
| hsa-miR-6769a-5p            | 4.21              | 2.92              | 2.46        | 2.50E-03 |
| hsa-miR-1296-5p             | 4.78              | 3.49              | 2.44        | 4.88E-02 |
| hsa-mir-21                  | 4.55              | 3.26              | 2.43        | 5.80E-03 |
| hsa-miR-371a-5p             | 3.85              | 2.58              | 2.41        | 6.20E-03 |
| hsa-miR-5010-5p             | 4.1               | 2.85              | 2.37        | 4.07E-02 |
| hsa-miR-8060                | 4.05              | 2.82              | 2.34        | 5.40E-03 |
| hsa-miR-492                 | 2.82              | 1.66              | 2.24        | 1.65E-02 |

|                 |       |       |       |          |
|-----------------|-------|-------|-------|----------|
| hsa-mir-3653    | 4.44  | 3.28  | 2.24  | 1.06E-02 |
| hsa-miR-3187-3p | 4.41  | 3.25  | 2.23  | 2.07E-02 |
| hsa-miR-665     | 5.58  | 4.46  | 2.17  | 4.34E-02 |
| hsa-miR-6508-5p | 3.36  | 2.28  | 2.11  | 1.16E-02 |
| hsa-miR-221-3p  | 11.19 | 10.12 | 2.1   | 4.20E-03 |
| hsa-miR-214-3p  | 12.47 | 11.4  | 2.09  | 4.46E-02 |
| hsa-miR-6757-5p | 4.8   | 3.75  | 2.07  | 1.70E-02 |
| hsa-miR-6785-5p | 4.96  | 3.94  | 2.03  | 1.47E-02 |
| hsa-miR-5088-5p | 2.59  | 1.58  | 2.02  | 1.08E-02 |
| hsa-miR-874-5p  | 3.77  | 2.77  | 2.01  | 1.17E-02 |
| hsa-miR-6766-5p | 2.51  | 1.51  | 1.99  | 5.70E-03 |
| hsa-miR-222-3p  | 11.22 | 10.23 | 1.99  | 7.10E-03 |
| hsa-miR-198     | 2.59  | 1.6   | 1.99  | 4.69E-02 |
| hsa-miR-6845-5p | 4.94  | 3.97  | 1.96  | 1.75E-02 |
| hsa-mir-345     | 2.94  | 1.97  | 1.95  | 3.48E-02 |
| hsa-miR-6124    | 5.94  | 4.98  | 1.94  | 2.90E-03 |
| hsa-miR-4657    | 2.67  | 1.72  | 1.94  | 1.90E-03 |
| hsa-miR-23a-3p  | 13.41 | 12.45 | 1.94  | 1.09E-02 |
| hsa-miR-4534    | 5.09  | 4.15  | 1.92  | 4.76E-02 |
| hsa-miR-542-5p  | 2.42  | 1.49  | 1.91  | 4.98E-02 |
| hsa-mir-210     | 2.21  | 1.28  | 1.9   | 6.00E-04 |
| hsa-miR-4743-5p | 5.1   | 4.2   | 1.87  | 1.12E-02 |
| hsa-miR-3154    | 3.3   | 2.4   | 1.86  | 3.12E-02 |
| hsa-miR-3935    | 2.77  | 1.88  | 1.85  | 2.99E-02 |
| hsa-miR-181a-5p | 12.43 | 11.54 | 1.85  | 7.60E-03 |
| hsa-miR-6830-5p | 3.96  | 3.12  | 1.79  | 2.08E-02 |
| hsa-miR-4800-3p | 2.83  | 1.99  | 1.79  | 2.23E-02 |
| hsa-let-7i-5p   | 12.16 | 11.32 | 1.79  | 2.82E-02 |
| hsa-miR-760     | 2.46  | 1.66  | 1.74  | 5.40E-03 |
| hsa-miR-7152-3p | 4.34  | 3.55  | 1.72  | 3.37E-02 |
| hsa-miR-7851-3p | 2.61  | 1.82  | 1.72  | 1.29E-02 |
| hsa-miR-6792-5p | 2.84  | 2.06  | 1.72  | 3.38E-02 |
| hsa-miR-145-5p  | 13.67 | 12.9  | 1.71  | 4.50E-03 |
| hsa-miR-6862-5p | 2.38  | 1.62  | 1.7   | 4.00E-03 |
| hsa-miR-6080    | 2.39  | 1.71  | 1.6   | 1.88E-02 |
| hsa-miR-6795-5p | 4.33  | 3.66  | 1.59  | 3.49E-02 |
| hsa-miR-4722-5p | 2.75  | 2.08  | 1.59  | 4.46E-02 |
| hsa-mir-663b    | 3.19  | 2.52  | 1.59  | 3.68E-02 |
| hsa-miR-6895-5p | 2.53  | 1.88  | 1.57  | 9.50E-03 |
| hsa-miR-4778-5p | 4.16  | 3.51  | 1.57  | 4.05E-02 |
| hsa-miR-187-5p  | 3.27  | 2.64  | 1.55  | 1.16E-02 |
| hsa-mir-887     | 1.85  | 1.24  | 1.52  | 1.79E-02 |
| hsa-miR-4750-3p | 2.12  | 1.52  | 1.52  | 1.99E-02 |
| hsa-miR-181c-3p | 1.97  | 1.37  | 1.51  | 1.50E-02 |
| hsa-miR-4283    | 1.83  | 1.25  | 1.5   | 2.30E-03 |
| hsa-miR-548x-3p | 3.63  | 4.22  | -1.51 | 2.95E-02 |

|                 |      |      |       |          |
|-----------------|------|------|-------|----------|
| hsa-miR-4287    | 1.71 | 2.41 | -1.63 | 1.87E-02 |
| hsa-mir-548e    | 1.31 | 2.02 | -1.64 | 1.10E-02 |
| hsa-mir-375     | 2.11 | 2.85 | -1.67 | 3.16E-02 |
| hsa-miR-3618    | 2.11 | 2.92 | -1.76 | 4.70E-02 |
| hsa-miR-509-5p  | 2.47 | 3.35 | -1.85 | 1.30E-03 |
| hsa-mir-6722    | 6.65 | 7.64 | -2    | 4.62E-02 |
| hsa-miR-4742-5p | 4.23 | 5.27 | -2.06 | 2.15E-02 |
| hsa-mir-139     | 3.83 | 4.97 | -2.2  | 4.92E-02 |
| hsa-miR-451a    | 3.12 | 4.67 | -2.93 | 3.50E-03 |
| hsa-miR-139-5p  | 6.92 | 9.1  | -4.51 | 1.20E-03 |
| hsa-miR-486-5p  | 5.28 | 7.5  | -4.65 | 1.33E-02 |
| hsa-miR-148a-5p | 1.7  | 4.73 | -8.15 | 4.08E-02 |

*Supplementary Table S2: List of differentially expressed (DE) miRNA in PDX F1 samples vs tumour samples comparison*

| <b>Transcript ID(Array Design)</b> | <b>F1 Avg (log2)</b> | <b>Tumour Avg (log2)</b> | <b>Fold Change</b> | <b>P-val</b> |
|------------------------------------|----------------------|--------------------------|--------------------|--------------|
| hsa-miR-206                        | 6.58                 | 1.88                     | 26.01              | 8.59E-05     |
| hsa-miR-4521                       | 5.85                 | 1.25                     | 24.27              | 4.48E-06     |
| hsa-miR-6872-5p                    | 8.5                  | 4.1                      | 21.19              | 1.35E-07     |
| hsa-miR-1290                       | 6.62                 | 2.67                     | 15.4               | 6.80E-03     |
| hsa-miR-486-5p                     | 8.93                 | 5.28                     | 12.48              | 1.40E-03     |
| hsa-miR-615-3p                     | 6.11                 | 2.68                     | 10.81              | 5.59E-05     |
| hsa-miR-203a                       | 7.44                 | 4.2                      | 9.43               | 2.30E-03     |
| hsa-miR-6778-5p                    | 9.99                 | 6.89                     | 8.56               | 5.42E-08     |
| hsa-miR-2467-3p                    | 6.06                 | 3.08                     | 7.91               | 2.01E-08     |
| hsa-miR-139-5p                     | 9.67                 | 6.92                     | 6.7                | 2.78E-06     |
| hsa-miR-29b-1-5p                   | 6.94                 | 4.39                     | 5.82               | 2.64E-02     |
| hsa-miR-6754-3p                    | 4.23                 | 1.7                      | 5.77               | 2.00E-04     |
| hsa-miR-4656                       | 8.51                 | 6.03                     | 5.59               | 2.07E-06     |
| hsa-miR-138-5p                     | 4.83                 | 2.36                     | 5.55               | 1.60E-02     |
| hsa-mir-3154                       | 7.48                 | 5.12                     | 5.14               | 1.60E-05     |
| hsa-miR-4298                       | 10.15                | 7.8                      | 5.09               | 1.59E-05     |
| hsa-miR-4485                       | 9.94                 | 7.62                     | 5.01               | 5.10E-03     |
| hsa-miR-196a-5p                    | 4.1                  | 1.89                     | 4.64               | 4.00E-03     |
| hsa-miR-378d                       | 7.16                 | 5.01                     | 4.44               | 4.30E-02     |
| hsa-miR-378e                       | 4.15                 | 2.08                     | 4.2                | 1.10E-03     |
| hsa-miR-652-3p                     | 10.28                | 8.26                     | 4.06               | 1.35E-07     |
| hsa-miR-378i                       | 8.51                 | 6.57                     | 3.84               | 2.84E-02     |
| hsa-miR-133a-3p                    | 3.46                 | 1.53                     | 3.83               | 2.35E-02     |
| hsa-mir-139                        | 5.75                 | 3.83                     | 3.77               | 7.02E-05     |
| hsa-miR-378g                       | 6.35                 | 4.45                     | 3.72               | 3.91E-02     |

|                 |       |       |       |          |
|-----------------|-------|-------|-------|----------|
| hsa-miR-378c    | 9.39  | 7.51  | 3.67  | 9.00E-04 |
| hsa-miR-3911    | 6.56  | 4.88  | 3.21  | 1.40E-03 |
| hsa-miR-211-5p  | 2.78  | 1.1   | 3.21  | 1.11E-02 |
| hsa-miR-378a-3p | 10.67 | 9.11  | 2.95  | 1.29E-05 |
| hsa-mir-1973    | 3.51  | 2.02  | 2.8   | 6.00E-04 |
| hsa-mir-6872    | 3.11  | 1.67  | 2.71  | 7.41E-05 |
| hsa-miR-215-5p  | 2.94  | 1.52  | 2.67  | 1.21E-02 |
| hsa-miR-34c-5p  | 3.75  | 2.36  | 2.62  | 1.74E-02 |
| hsa-miR-3935    | 4.09  | 2.77  | 2.5   | 1.59E-02 |
| hsa-miR-612     | 3.91  | 2.59  | 2.5   | 2.40E-02 |
| hsa-miR-7847-3p | 9.86  | 8.55  | 2.49  | 1.20E-03 |
| hsa-miR-4669    | 6.98  | 5.69  | 2.45  | 6.50E-03 |
| hsa-miR-7162-3p | 6.65  | 5.37  | 2.44  | 8.60E-03 |
| hsa-miR-4484    | 9.09  | 7.9   | 2.28  | 9.30E-03 |
| hsa-miR-222-3p  | 12.4  | 11.22 | 2.27  | 2.41E-02 |
| hsa-miR-133b    | 2.59  | 1.42  | 2.25  | 4.38E-02 |
| hsa-miR-1910-3p | 4.85  | 3.68  | 2.25  | 2.72E-02 |
| hsa-miR-6723-5p | 6.2   | 5.15  | 2.07  | 6.40E-03 |
| hsa-miR-4448    | 2.84  | 1.84  | 2     | 4.62E-02 |
| hsa-miR-451a    | 4.11  | 3.12  | 1.98  | 2.64E-02 |
| hsa-miR-93-5p   | 11.09 | 10.13 | 1.95  | 2.70E-02 |
| hsa-miR-4743-5p | 6.06  | 5.1   | 1.94  | 2.20E-03 |
| hsa-miR-34a-5p  | 9.72  | 8.79  | 1.9   | 3.65E-02 |
| hsa-miR-4801    | 3.12  | 2.21  | 1.87  | 1.80E-03 |
| hsa-miR-4534    | 5.96  | 5.09  | 1.83  | 3.49E-02 |
| hsa-miR-6504-5p | 2.04  | 1.18  | 1.81  | 1.03E-02 |
| hsa-miR-6831-5p | 6.44  | 5.58  | 1.81  | 1.32E-02 |
| hsa-mir-31      | 2.63  | 1.8   | 1.77  | 1.88E-02 |
| hsa-miR-4445-3p | 3.12  | 2.31  | 1.75  | 1.44E-02 |
| hsa-mir-3123    | 2.81  | 2.04  | 1.71  | 1.30E-03 |
| hsa-miR-196b-5p | 2.04  | 1.27  | 1.71  | 1.31E-02 |
| hsa-mir-4485    | 3.96  | 3.21  | 1.69  | 3.90E-03 |
| hsa-miR-140-3p  | 10.25 | 9.53  | 1.65  | 1.68E-02 |
| hsa-miR-6880-5p | 6.45  | 5.75  | 1.63  | 3.62E-02 |
| hsa-miR-210-5p  | 2.89  | 2.19  | 1.62  | 3.70E-03 |
| hsa-mir-3935    | 2.64  | 1.95  | 1.62  | 1.32E-02 |
| hsa-miR-16-5p   | 11.58 | 10.89 | 1.61  | 4.66E-02 |
| hsa-miR-15b-5p  | 11.24 | 10.58 | 1.58  | 8.60E-03 |
| hsa-miR-298     | 2.14  | 1.49  | 1.57  | 4.61E-02 |
| hsa-miR-6819-5p | 7.65  | 7.02  | 1.55  | 3.15E-02 |
| hsa-miR-4793-3p | 1.94  | 1.31  | 1.55  | 2.05E-02 |
| hsa-miR-718     | 2.47  | 1.88  | 1.5   | 4.30E-02 |
| hsa-miR-320c    | 12.23 | 12.82 | -1.5  | 1.17E-02 |
| hsa-miR-6503-5p | 1.1   | 1.69  | -1.51 | 8.40E-03 |
| hsa-mir-320a    | 7.82  | 8.42  | -1.51 | 1.05E-02 |
| hsa-miR-4792    | 1.34  | 1.94  | -1.52 | 8.30E-03 |

|                  |       |       |       |          |
|------------------|-------|-------|-------|----------|
| hsa-miR-383-5p   | 1.36  | 1.96  | -1.52 | 2.43E-02 |
| hsa-miR-6511a-5p | 4.14  | 4.74  | -1.52 | 1.44E-02 |
| hsa-miR-4787-5p  | 12.47 | 13.07 | -1.52 | 1.46E-02 |
| hsa-mir-4477a    | 1.79  | 2.41  | -1.54 | 1.00E-02 |
| hsa-miR-570-5p   | 1.44  | 2.06  | -1.54 | 2.54E-02 |
| hsa-miR-548ai    | 1.44  | 2.06  | -1.54 | 2.54E-02 |
| hsa-miR-132-5p   | 1.3   | 1.93  | -1.54 | 1.91E-02 |
| hsa-mir-4477a    | 1.77  | 2.4   | -1.54 | 2.80E-03 |
| hsa-mir-155      | 1.64  | 2.3   | -1.58 | 2.01E-02 |
| hsa-miR-628-5p   | 3.75  | 4.41  | -1.58 | 1.80E-02 |
| hsa-miR-329-3p   | 1.17  | 1.83  | -1.58 | 2.06E-02 |
| hsa-miR-3656     | 11.08 | 11.74 | -1.59 | 2.44E-02 |
| hsa-miR-4725-5p  | 1.38  | 2.06  | -1.6  | 1.01E-02 |
| hsa-miR-6784-5p  | 3.98  | 4.68  | -1.62 | 3.15E-02 |
| hsa-miR-199b-5p  | 1.24  | 1.95  | -1.63 | 8.50E-03 |
| hsa-mir-6836     | 4.48  | 5.2   | -1.64 | 2.14E-02 |
| hsa-miR-99b-5p   | 10.95 | 11.66 | -1.64 | 1.93E-02 |
| hsa-miR-6084     | 1.46  | 2.18  | -1.65 | 1.46E-02 |
| hsa-miR-638      | 11.1  | 11.83 | -1.65 | 3.21E-02 |
| hsa-mir-572      | 1.92  | 2.64  | -1.65 | 1.70E-03 |
| hsa-miR-6125     | 11.56 | 12.28 | -1.65 | 7.00E-03 |
| hsa-let-7f-1-3p  | 1.63  | 2.35  | -1.65 | 3.50E-03 |
| hsa-mir-487b     | 1.02  | 1.75  | -1.67 | 3.00E-04 |
| hsa-miR-6075     | 6.49  | 7.24  | -1.68 | 1.76E-02 |
| hsa-miR-320d     | 11.09 | 11.84 | -1.68 | 1.55E-02 |
| hsa-miR-1273h-5p | 3.43  | 4.19  | -1.7  | 3.86E-02 |
| hsa-miR-4638-5p  | 1.89  | 2.67  | -1.72 | 1.16E-02 |
| hsa-mir-548ag-1  | 2.92  | 3.7   | -1.72 | 2.71E-02 |
| hsa-miR-543      | 1.79  | 2.6   | -1.75 | 3.86E-02 |
| hsa-miR-323a-3p  | 1.88  | 2.69  | -1.76 | 6.20E-03 |
| hsa-miR-3187-3p  | 3.6   | 4.41  | -1.76 | 4.26E-02 |
| hsa-mir-145      | 2.06  | 2.88  | -1.77 | 1.12E-05 |
| hsa-miR-665      | 4.76  | 5.58  | -1.77 | 2.45E-02 |
| hsa-miR-3122     | 2.04  | 2.87  | -1.78 | 3.64E-02 |
| hsa-miR-1227-5p  | 8.4   | 9.25  | -1.8  | 3.69E-02 |
| hsa-miR-125b-5p  | 12.74 | 13.6  | -1.81 | 2.30E-03 |
| hsa-miR-1273f    | 2.49  | 3.38  | -1.85 | 6.90E-03 |
| hsa-miR-7108-5p  | 9.97  | 10.86 | -1.86 | 1.24E-02 |
| hsa-miR-3185     | 7.39  | 8.29  | -1.86 | 2.16E-02 |
| hsa-miR-129-2-3p | 1.76  | 2.66  | -1.87 | 1.05E-02 |
| hsa-miR-7851-3p  | 1.7   | 2.61  | -1.88 | 9.80E-03 |
| hsa-miR-6737-5p  | 3.24  | 4.18  | -1.92 | 1.90E-02 |
| hsa-miR-6790-5p  | 6.39  | 7.33  | -1.92 | 3.02E-02 |
| hsa-miR-130a-3p  | 7.05  | 7.99  | -1.93 | 1.25E-02 |
| hsa-miR-34c-3p   | 2.77  | 3.74  | -1.97 | 9.00E-04 |
| hsa-miR-6511b-3p | 1.33  | 2.31  | -1.97 | 2.22E-02 |

|                   |       |       |       |          |
|-------------------|-------|-------|-------|----------|
| hsa-miR-132-3p    | 8.55  | 9.53  | -1.98 | 1.65E-02 |
| hsa-miR-381-3p    | 2.02  | 3.02  | -2    | 4.64E-02 |
| hsa-mir-487b      | 0.85  | 1.86  | -2.01 | 2.00E-04 |
| hsa-miR-1825      | 1.96  | 2.98  | -2.03 | 2.37E-02 |
| hsa-miR-887-3p    | 1.41  | 2.45  | -2.05 | 4.60E-03 |
| hsa-miR-4467      | 9.23  | 10.27 | -2.06 | 3.14E-02 |
| hsa-miR-6754-5p   | 2.31  | 3.35  | -2.06 | 2.32E-02 |
| hsa-miR-4417      | 5.61  | 6.68  | -2.09 | 3.62E-02 |
| hsa-miR-650       | 2.27  | 3.35  | -2.12 | 5.60E-03 |
| hsa-miR-214-3p    | 11.38 | 12.47 | -2.13 | 3.01E-02 |
| hsa-miR-4646-5p   | 4.28  | 5.39  | -2.16 | 2.81E-02 |
| hsa-miR-3917      | 2.04  | 3.16  | -2.16 | 4.10E-02 |
| hsa-miR-542-5p    | 1.31  | 2.42  | -2.17 | 2.10E-03 |
| hsa-miR-2861      | 10.2  | 11.34 | -2.2  | 3.00E-03 |
| hsa-miR-23c       | 3.75  | 4.9   | -2.21 | 4.99E-02 |
| hsa-miR-494-3p    | 7.91  | 9.05  | -2.21 | 3.66E-02 |
| hsa-miR-493-5p    | 1.19  | 2.34  | -2.21 | 7.40E-03 |
| hsa-miR-5572      | 4.37  | 5.52  | -2.22 | 3.50E-02 |
| hsa-miR-199a-3p   | 10.08 | 11.24 | -2.25 | 1.03E-02 |
| hsa-miR-199b-3p   | 10.08 | 11.24 | -2.25 | 1.03E-02 |
| hsa-miR-574-3p    | 9.87  | 11.05 | -2.26 | 5.60E-03 |
| hsa-miR-1304-3p   | 1.35  | 2.55  | -2.3  | 1.00E-04 |
| hsa-miR-874-3p    | 6.5   | 7.71  | -2.32 | 3.32E-02 |
| hsa-mir-424       | 2.83  | 4.06  | -2.35 | 1.80E-03 |
| hsa-mir-3687      | 2.85  | 4.09  | -2.35 | 5.60E-03 |
| hsa-miR-491-5p    | 3.52  | 4.76  | -2.36 | 4.08E-02 |
| hsa-miR-197-3p    | 7.44  | 8.7   | -2.41 | 1.14E-02 |
| hsa-miR-1291      | 2.06  | 3.33  | -2.41 | 1.30E-02 |
| hsa-miR-3615      | 2.58  | 3.9   | -2.5  | 9.30E-03 |
| hsa-miR-7641      | 10.2  | 11.53 | -2.52 | 2.40E-02 |
| hsa-miR-940       | 3.13  | 4.47  | -2.53 | 1.10E-03 |
| hsa-mir-125b-2    | 0.85  | 2.2   | -2.55 | 2.00E-04 |
| hsa-miR-3195      | 7.54  | 8.9   | -2.56 | 2.87E-02 |
| hsa-miR-375       | 10.11 | 11.49 | -2.59 | 4.15E-02 |
| hsa-miR-6511a-3p  | 2.13  | 3.54  | -2.66 | 3.90E-03 |
| hsa-miR-6508-5p   | 1.86  | 3.36  | -2.82 | 1.00E-03 |
| hsa-miR-874-5p    | 2.27  | 3.77  | -2.84 | 7.00E-04 |
| hsa-miR-193a-5p   | 7.86  | 9.38  | -2.86 | 1.59E-02 |
| hsa-miR-4730      | 5.49  | 7.01  | -2.88 | 2.65E-02 |
| hsa-miR-1270      | 1.55  | 3.09  | -2.91 | 2.27E-02 |
| hsa-miR-125b-1-3p | 3.86  | 5.43  | -2.98 | 2.26E-02 |
| hsa-miR-150-5p    | 8.14  | 9.73  | -3.01 | 2.70E-02 |
| hsa-miR-487a-3p   | 1.35  | 2.99  | -3.11 | 1.40E-03 |
| hsa-miR-146b-5p   | 6.62  | 8.27  | -3.14 | 5.00E-04 |
| hsa-miR-6068      | 6.66  | 8.32  | -3.16 | 2.00E-03 |
| hsa-miR-4310      | 1.52  | 3.2   | -3.21 | 7.00E-04 |

|                 |       |       |        |          |
|-----------------|-------|-------|--------|----------|
| hsa-miR-504-5p  | 1.46  | 3.17  | -3.27  | 3.53E-02 |
| hsa-miR-409-5p  | 2.33  | 4.06  | -3.32  | 4.14E-02 |
| hsa-miR-99a-5p  | 8.58  | 10.31 | -3.32  | 1.10E-03 |
| hsa-miR-337-5p  | 1.41  | 3.15  | -3.34  | 3.00E-04 |
| hsa-miR-134-5p  | 5.37  | 7.11  | -3.34  | 2.80E-03 |
| hsa-miR-199a-5p | 8.7   | 10.49 | -3.45  | 4.00E-04 |
| hsa-miR-3653    | 2.65  | 4.44  | -3.46  | 8.00E-04 |
| hsa-miR-4269    | 5.29  | 7.08  | -3.46  | 5.00E-03 |
| hsa-miR-6069    | 2     | 3.82  | -3.51  | 2.40E-03 |
| hsa-miR-766-3p  | 2.55  | 4.39  | -3.58  | 1.60E-03 |
| hsa-miR-1238-3p | 1.49  | 3.37  | -3.68  | 2.10E-03 |
| hsa-miR-193b-3p | 8.03  | 9.95  | -3.78  | 1.37E-02 |
| hsa-miR-145-5p  | 11.73 | 13.67 | -3.83  | 1.90E-08 |
| hsa-miR-143-3p  | 8.48  | 10.43 | -3.87  | 1.07E-05 |
| hsa-miR-505-3p  | 2.73  | 4.71  | -3.95  | 5.80E-03 |
| hsa-miR-664b-5p | 2.65  | 4.66  | -4.03  | 8.50E-05 |
| hsa-miR-1281    | 5.22  | 7.26  | -4.11  | 3.60E-03 |
| hsa-miR-4324    | 2.66  | 4.74  | -4.22  | 3.00E-03 |
| hsa-miR-572     | 4.46  | 6.55  | -4.24  | 1.60E-03 |
| hsa-miR-3687    | 2.78  | 4.91  | -4.38  | 6.70E-03 |
| hsa-miR-193b-5p | 4.2   | 6.37  | -4.51  | 4.30E-02 |
| hsa-miR-654-5p  | 1.45  | 3.69  | -4.72  | 2.00E-04 |
| hsa-miR-21-3p   | 4.1   | 6.37  | -4.81  | 9.20E-03 |
| hsa-miR-485-3p  | 3.43  | 5.71  | -4.88  | 5.40E-03 |
| hsa-miR-143-5p  | 1.52  | 3.84  | -4.97  | 1.42E-05 |
| hsa-miR-664b-3p | 3.05  | 5.42  | -5.16  | 4.11E-02 |
| hsa-miR-100-5p  | 7.69  | 10.09 | -5.27  | 2.00E-04 |
| hsa-miR-5571-5p | 1.98  | 4.39  | -5.3   | 4.00E-04 |
| hsa-miR-155-5p  | 8.04  | 10.47 | -5.4   | 1.11E-02 |
| hsa-miR-377-5p  | 1.26  | 3.72  | -5.49  | 6.00E-04 |
| hsa-miR-1247-5p | 2.84  | 5.31  | -5.55  | 5.10E-03 |
| hsa-miR-493-3p  | 1.17  | 3.78  | -6.1   | 3.85E-06 |
| hsa-miR-371b-5p | 3.77  | 6.39  | -6.11  | 6.00E-04 |
| hsa-miR-191-3p  | 2.16  | 4.79  | -6.2   | 4.22E-05 |
| hsa-miR-485-5p  | 3.27  | 5.98  | -6.58  | 1.70E-03 |
| hsa-miR-370-3p  | 2.78  | 5.55  | -6.8   | 1.00E-04 |
| hsa-miR-1296-5p | 1.99  | 4.78  | -6.92  | 4.00E-04 |
| hsa-miR-654-3p  | 1.15  | 4.17  | -8.14  | 4.27E-05 |
| hsa-miR-216b-5p | 3.07  | 6.32  | -9.49  | 1.86E-02 |
| hsa-miR-487a-5p | 1.29  | 4.66  | -10.3  | 4.86E-05 |
| hsa-miR-1301-3p | 3.11  | 6.6   | -11.22 | 1.80E-03 |
| hsa-miR-409-3p  | 4.45  | 7.96  | -11.45 | 1.47E-06 |
| hsa-miR-146b-3p | 1.51  | 5.18  | -12.7  | 6.39E-06 |
| hsa-miR-217     | 1.19  | 4.94  | -13.39 | 1.98E-02 |
| hsa-miR-503-5p  | 2.47  | 6.31  | -14.24 | 2.30E-03 |
| hsa-miR-1271-5p | 2.13  | 6.22  | -17.01 | 1.88E-06 |

|                   |      |      |         |          |
|-------------------|------|------|---------|----------|
| hsa-miR-125b-2-3p | 1.83 | 6.25 | -21.33  | 6.58E-07 |
| hsa-miR-708-5p    | 1.68 | 6.11 | -21.66  | 2.00E-03 |
| hsa-miR-487b-3p   | 2.48 | 7.58 | -34.33  | 1.31E-09 |
| hsa-miR-424-3p    | 1.41 | 7.24 | -56.66  | 2.27E-06 |
| hsa-miR-432-5p    | 1.46 | 8.29 | -113.44 | 2.10E-13 |
